# Supplementary material for: Behavioural and computational methods reveal differential effects for how delayed and rapid onset antidepressants effect decision making in rats
Source: PubMed Central journal article supplement (PMC5720479; doi:10.1016/j.euroneuro.2017.09.008), 2017-12
Supplement: mmc8.pdf [file mmc8.pdf]

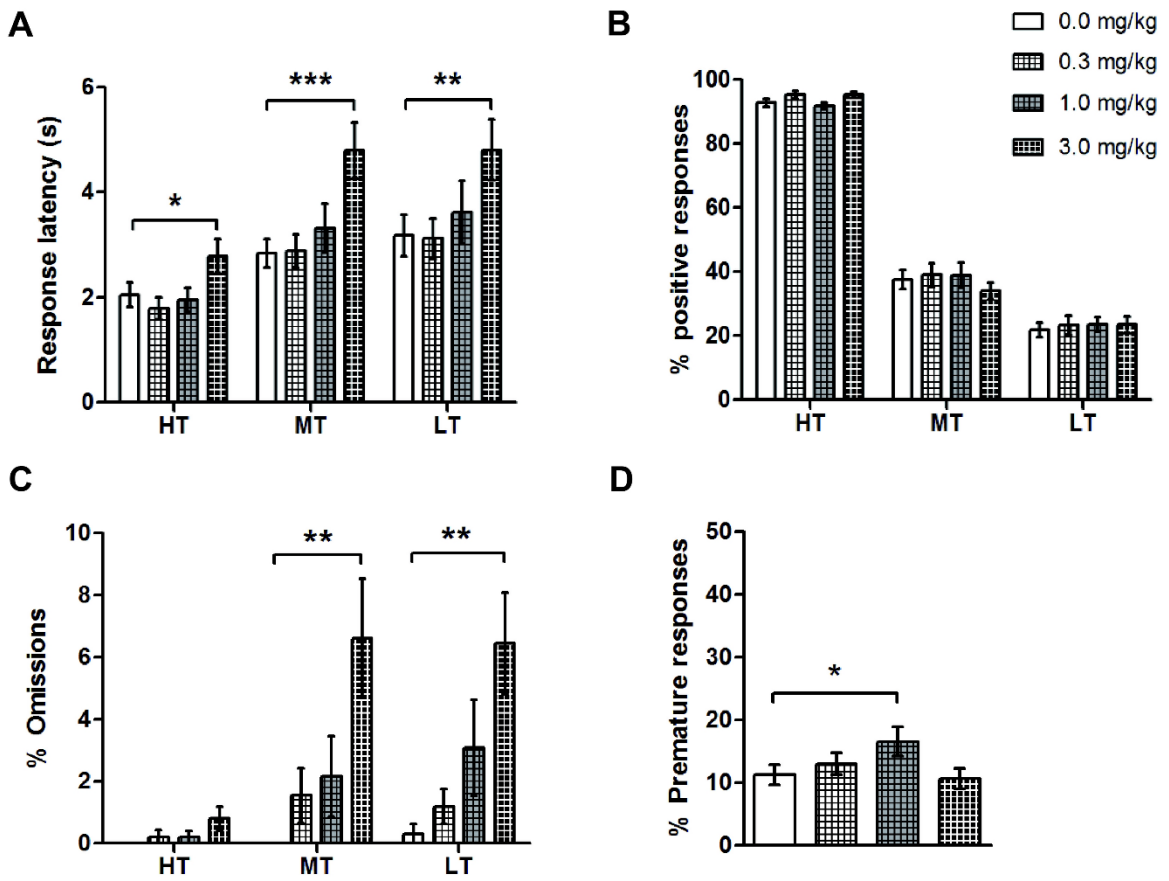

**Supplementary Figure 3 – Behavioural data from the judgement bias task following acute treatment with phencyclidine.**

Acute doses of PCP (0.0, 0.3, 1.0, 3.0 mg/kg) were administered by intraperitoneal injection to measure their effect on judgement bias. (A) PCP caused responses latencies to become slower across all three tones for the highest dose (3.0 mg/kg) only (significant session\*tone interaction:  $F_{4,49,67.41}=3.079$ ,  $p=0.018$  and significant post-hoc tests:  $p_s \leq 0.019$ ). (B) PCP did not alter percentage of positive responses. (C) The highest dose of PCP (3.0 mg/kg) caused rats to omit more responses for the midpoint and low reward tones (significant session\*tone interaction:  $F_{2,76,41.44}=4.101$ ;  $p=0.014$  and significant post-hoc tests:  $p_s \leq 0.002$ ). (D) 1.0 mg/kg PCP caused an increase in percentage of premature responses (main effect of session:  $F_{3,45}=2.880$ ,  $p=0.046$  and significant pairwise comparison against vehicle:  $p=0.050$ ). Data represent mean  $\pm$  SEM.  $n=16$ , 40 min pre-treatment. \*\*\* $p < 0.001$ , \*\* $p < 0.01$ , \* $p < 0.05$ . HT - high reward tone; MT - midpoint tone; LT - low reward tone.
